# Supplementary material
Source: publisher site journal article supplement (https://www.dovepress.com/article/supplementary_file/521723/521723%20Supplementary%20Tables.docx)
Supplement: Supplementary file 1 [file 521723%20Supplementary%20Tables.docx]

**Supplementary Table 1. Comparison of the characteristics between children with positional OSA and those with non-positional OSA, among those having moderate/severe OSA (OAHI ≥ 5/hour) (N=147)**

| Characteristics | Moderate/severe OSA (OAHI ≥5/h)  N = 147 | | |
| --- | --- | --- | --- |
| Positional OSA  N = 75 | Non-positional OSA  N = 72 | P value |
| Male sex, n (%) | 55 (73) | 58 (81) | 0.299 |
| Age, years | 11.02 ± 3.36 | 8.87 ± 2.59 | <0.001* |
| Tanner stage <2, n (%) | 44 (59) | 63 (88) | <0.001* |
| BMI z-score | 0.72 ± 1.24 | 0.54 ± 1.18 | 0.374 |
| Waist z-score | 0.91 ± 1.14 | 0.60 ± 1.20 | 0.113 |
| Overweight/obese, n (%) | 34 (45) | 28 (39) | 0.429 |
| Tonsils ≥ grade 2, n (%) | 52 (69) | 58 (81) | 0.057 |
| Allergic rhinitis, n (%) | 42 (56) | 46 (64) | 0.329 |
| Habitual snoring†, n (%) | 49 (65) | 50 (69) | 0.676 |
| Mouth breathing†, n (%) | 31 (41) | 42 (58) | 0.047* |
| Breathing difficulty during sleep†, n (%) | 9 (12) | 19 (26) | 0.029* |
| Night sweats†, n (%) | 8 (11) | 19 (26) | 0.015* |
| Prone sleep†, n (%) | 20 (27) | 16 (22) | 0.501 |
| ESS score | 6.08 ± 3.90 | 5.37 ± 4.04 | 0.330 |
| PDSS | 14.43 ± 4.83 | 13.57 ± 4.75 | 0.329 |
| OSA-18 | 54.48 ± 16.84 | 57.79 ± 18.42 | 0.261 |
| Inattention score | 10.30 ± 5.30 | 10.75 ± 5.24 | 0.637 |
| Hyperactivity score | 7.37 ± 4.92 | 7.86 ± 5.75 | 0.616 |
| Wake SBP, mmHg§ | 113.33 ± 9.51 | 109.73 ± 10.52 | 0.038* |
| Wake SBP z-score§ | -0.90 ± 0.88 | -1.00 ± 1.11 | 0.570 |
| Wake DBP, mmHg§ | 70.14 ± 5.06 | 70.51 ± 5.25 | 0.678 |
| Wake DBP z-score§ | -0.44 ± 0.78 | -0.28 ± 0.79 | 0.240 |
| Sleep SBP, mmHg§ | 103.67 ± 9.11 | 100.82 ± 10.21 | 0.093 |
| Sleep SBP z-score§ | 0.44 ± 0.94 | 0.42 ± 1.18 | 0.910 |
| Sleep DBP, mmHg§ | 61.39 ± 5.35 | 62.83 ± 5.98 | 0.147 |
| Sleep DBP z-score§ | 0.89 ± 0.93 | 1.24 ± 0.98 | 0.040* |
| Nocturnal SBP dipping, %§ | 8.33 ± 5.60 | 7.99 ± 5.58 | 0.724 |
| Nocturnal DBP dipping, %§ | 12.23 ± 6.59 | 10.64 ± 8.52 | 0.232 |

Data presented as mean ± standard deviation unless otherwise specified.

Abbreviations: OSA, obstructive sleep apnea; h, hour; OAHI, obstructive apnea–hypopnea index; BMI, body mass index; ESS, Epworth Sleepiness Scale; PDSS, Pediatric Daytime Sleepiness Scale; DBP, diastolic blood pressure; SBP, systolic blood pressure

†Habitual snoring, mouth-breathing, difficulty breathing during sleep, night sweats, and prone sleep were defined as present if having the symptoms ≥ 3 nights per week

§Data were available from 68 Positional OSA and 68 non-positional OSA

* Statistically significant P value

**Supplementary Table 2. Comparison of polysomnographic variables between children with positional OSA and those with non-positional OSA, among those having moderate/severe OSA (OAHI ≥ 5/hour) (N=147)**

| Polysomnographic variables | Moderate/severe OSA (OAHI ≥5/h)  N = 147 | | |
| --- | --- | --- | --- |
| Positional OSA  N = 75 | Non-positional OSA  N = 72 | P value |
| Total sleep time, minutes | 496.71 ± 75.42 | 519.24 ± 56.15 | 0.041* |
| Sleep efficiency, % | 87.67 ± 8.11 | 89.54 ±7.33 | 0.145 |
| Wake after sleep onset | 47.53 ± 41.13 | 43.47 ±39.65 | 0.543 |
| REM percentage | 20.40 ± 4.44 | 20.74 ± 7.82 | 0.746 |
| REM minutes | 102.42 ± 30.39 | 108.69 ± 46.24 | 0.331 |
| N1 percentage | 11.83 ± 6.01 | 9.42 ± 7.19 | 0.029* |
| N1 minutes | 58.01 ± 29.02 | 48.44 ± 34.03 | 0.068 |
| N2 percentage | 37.55 ± 7.72 | 35.46 ± 8.91 | 0.131 |
| N2 minutes | 186.81 ± 49.05 | 184.05 ± 47.86 | 0.731 |
| N3 percentage | 30.22 ± 8.83 | 34.38 ± 10.12 | 0.009* |
| N3 minutes | 149.47 ± 48.01 | 178.06 ± 51.65 | <0.001* |
| Supine sleep duration, minutes | 244.37 ± 111.62 | 240.72 ± 132.47 | 0.857 |
| Non-supine sleep duration, minutes | 252.31 ± 105.31 | 278.48 ± 117.86 | 0.157 |
| OAHI, events/h, median (IQR) | 10.65 (6.91-20.04) | 12.74 (8.30-23.64) | 0.050 |
| OAHIsupine, events/h, median (IQR) | 19.04 (12.52-32.24) | 13.31 (7.47-23.77) | 0.003* |
| OAHInon-supine, events/h, median (IQR) | 3.70 (1.84-7.40) | 12.22 (8.23-26.02) | <0.001* |
| OAHIsupine/OAHInon-supine ratio, median (IQR) | 4.48 (2.72-10.52) | 0.92 (0.64-1.65) | <0.001* |
| ODI, events/h, median (IQR) | 6.20 (2.59-13.73) | 9.98 (6.30-19.28) | 0.003* |
| ODIsupine, events/h, median (IQR) | 10.62 (5.04-19.29) | 10.19 (5.68-18.26) | 0.811 |
| ODInon-supine, events/h, median (IQR) | 3.55 (1.04-9.15) | 11.05 (6.00-20.70) | <0.001* |
| ArI, events/h, median (IQR) | 23.12 (16.52-28.98) | 21.40 (16.46-27.07) | 0.358 |
| SpO2 nadir, % | 88.93 ± 4.95 | 85.04 ± 11.97 | 0.012* |

Data presented as mean ± standard deviation unless otherwise specified.

Abbreviations: OSA, obstructive sleep apnea; REM, rapid eye movement; OAHI, obstructive apnea–hypopnea index; h, hour; IQR, interquartile range; ODI, oxygen desaturation index; ArI, arousal index; SpO2, oxygen saturation; OAHIsupine, OAHI in supine sleep; OAHInon-supine OAHI in non-supine sleep

* Statistically significant P value

**Supplementary Table 3. Predictors for positional OSA in children with moderate/severe OSA by logistic regression (N=147)**

| Variables | B | S.E | OR | 95% CI | | P value |
| --- | --- | --- | --- | --- | --- | --- |
| Age | 0.282 | 0.080 | 1.326 | 1.135 | 1.550 | <0.001* |
| OAHI | -0.036 | 0.014 | 0.964 | 0.938 | 0.992 | 0.012* |
| Male sex | -0.252 | 0.433 | 0.777 | 0.333 | 1.814 | 0.560 |
| BMIz | -0.060 | 0.164 | 0.941 | 0.683 | 1.297 | 0.712 |
| Tonsils ≥ grade 2 | 0.362 | 0.520 | 1.436 | 0.519 | 3.976 | 0.486 |

Dependent variable: positional OSA

* Statistically significant P value
